# Supplementary material for: Tailoring Next Generation Plant Growth Promoting Microorganisms as Versatile Tools beyond Soil Desalinization: A Road Map towards Field Application
Source: MDPI journal article supplement (doi:10.3390/su13084422), 2021-04-15
Supplement: s1 [file s1]

Table S1.

| Bacterial isolates                                                                                                             | Type of Stress                                                                                                                                                  | References                                                   |
|--------------------------------------------------------------------------------------------------------------------------------|-----------------------------------------------------------------------------------------------------------------------------------------------------------------|--------------------------------------------------------------|
| <i>Arthrobacter</i> sp. RC100                                                                                                  | Degradation of carbamate pesticides by synthase carbaryl hydrolase                                                                                              | Hayatsu et al. (2001)                                        |
| <i>Azotobacter chroococcum</i> 67B and 76A                                                                                     | High tolerance to salt and drought stresses                                                                                                                     | Viscardi et al (2016)                                        |
| <i>Bacillus xiamenensis</i> PM14                                                                                               | NaCl, drought, and thermal stresses, antibiotic resistance, antifungal activity against <i>Fusarium oxysporum</i>                                               | Amna et al. (2020)                                           |
| <i>Bacillus velezensis</i> D3                                                                                                  | Abiotic and biotic stresses, Production of bioactive and volatile molecules                                                                                     | Nadeem et al. (2020)                                         |
| <i>Bacillus pumilis</i>                                                                                                        | NaCl and heavy metal stresses                                                                                                                                   | Khan et al (2016)                                            |
| <i>Pseudomonas alcaligenes</i> PsA15,<br><i>Bacillus polymyxa</i> BcP26<br><i>Mycobacterium phlei</i> MbP18                    | Tolerance of extreme temperatures, high concentrations of NaCl, metal stress and nutrient deficiency                                                            | Egamberdieva et al. 2007                                     |
| <i>Burkholderia cepacia</i> , SE4<br><i>Promicromonospora</i> sp. SE188<br><i>Acinetobacter Calcoaceticus</i> SE370            | Salt and drought stresses                                                                                                                                       | Kang et al (2014)                                            |
| <i>Pseudomonas putida</i> uw 4, uw 3<br><i>P. putida</i> GAP-45<br><i>P. putida</i> NBR 10987<br><i>Pseudomonas</i> sp. AMPKP6 | Drought and NaCl stresses, Phytoremediation heavy metals, Segradation of hydrocarbons (Phenanthrene, Pyrene); Tolerance to saline, drought and thermal stresses | Huang et al (2004); Kumar et al (2016); Sandhay et al (2009) |
| <i>Bacillus amyloliquefaciens</i>                                                                                              | NaCl and drought stresses tolerance and antifungal activity                                                                                                     | Vurukonda et al. (2016)                                      |
| <i>Pseudomonas pavonaceae</i> 170<br><i>Sphingomonas paucimobilis</i> UT26                                                     | Degradation of pesticides by haloalcanes deshalogenases                                                                                                         | (Sharma et al., 2018)                                        |
| <i>Bacillus pumilis</i> ; <i>Gluconacetobacter diazotrophicus</i> PAL5                                                         | NaCl and heavy metal stresses                                                                                                                                   | Khan et al (2016)                                            |
| <i>Rahnella</i> sp. JN6                                                                                                        | Heavy metal stress                                                                                                                                              | He et al. (2013)                                             |
| <i>Bacillus proteolyticus</i> 4D,<br><i>Bacillus velezensis</i> 9I <i>Lysinibacillus</i> sp. 10J                               | Heavy metal stress (lead resistant)                                                                                                                             | Kamaruzzaman et al. (2019)                                   |
| <i>Providencia</i> sp., <i>Morganella</i> sp.,<br><i>Stenotrophomonas</i> sp., <i>Bacillus</i> sp.                             | Bioremediation (cadmium tolerance)                                                                                                                              | Kartik et al. (2016)                                         |
| <i>Cupriavidus necator</i> GX5; <i>Sphingomonas</i> sp. GX15; <i>Curtobacterium</i> sp. GX31                                   | Bioremediation (cadmium tolerance)                                                                                                                              | Li et al. 2019                                               |
| <i>Bacillus</i> sp. SC2b                                                                                                       | Bioremediation (cadmium, zinc, plumb tolerance)                                                                                                                 | Ma et al., 2015                                              |

| Bacterial isolates                                                                                                                          | Type of Stress                                | References                |
|---------------------------------------------------------------------------------------------------------------------------------------------|-----------------------------------------------|---------------------------|
| <i>Pseudomonas rhizophila</i> 211                                                                                                           | Pesticide bioremediation                      | Hassen et al.2018         |
| <i>Enterobacter</i> sp. CID                                                                                                                 | Heavy metal resistance                        | Subrahmanyam et al. 2018  |
| <i>Pseudomonas extremorientalis</i> TSAU13<br><i>Pseudomonas chlororaphis</i> TSAU20                                                        | Stress tolerance; Biocontrol activity         | Egamberdieva et al.2017   |
| <i>Kocuria flava</i> 402<br><i>Bacillus vietnamiensis</i> 403                                                                               | Bioremediation (arsenic adsorption)           | Mallick et al. 2018       |
| <i>Methylobacterium</i> sp                                                                                                                  | Heavy metal resistance                        | Sánchez-López et al. 2018 |
| <i>Pseudomonas fluorescens</i> S4, S9; <i>P. aeruginosa</i> S8; <i>P. fluorescens</i> S10                                                   | Heavy metal tolerance                         | Meliani et al. 2016       |
| <i>Pseudomonas aeruginosa</i>                                                                                                               | Antifungal activity, chromium tolerance       | Patel et al. 2012         |
| <i>Pseudomonas poae</i> BA1; <i>Acinetobacter bouvetii</i> BP18; <i>Bacillus thuringiensis</i> BG3; <i>Stenotrophomonas rhizophila</i> BG32 | Degradation of hydrocarbons by biosurfactants | Ali Khan et al. (2017)    |

## References:

- Hayatsu, M.; Mizutani, A.; Hashimoto, M.; Sato, K.; Hayano, K. Purification and characterization of carbaryl hydrolase from *Arthrobacter* sp. RC100. *FEMS Microbiol. Lett.* **2001**, *201*(1), 99–103. doi:10.1111/j.1574-6968.2001.tb10739.x
- Viscardi, S.; Ventorino, V.; Duran, P.; Maggio, A.; De Pascale, S.; Mora, M. ; Pepe, O. Assessment of plant growth promoting activities and abiotic stress tolerance of *Azotobacter chroococcum* strains for a potential use in sustainable agriculture. *J. Soil Sci. Plant Nutr.* **2016**, *16*(3), 848-863. doi:10.4067/s0718-95162016005000060
- Amna; Xia, Y.; Farooq, M.A.; Javed, M.T.; Kamran, M.A.; Mukhtar, T., Ali, J.; Tabassum, T.; Rehman, S.; Munis, M.F.H.; Sultan, T.; Chaudhary, H.J. Chaudhary, H. J. Multi-stress tolerant PGPR *Bacillus xiamenensis* PM14 activating sugarcane (*Saccharum officinarum* L.) red rot disease resistance. *Plant Physiol. Biochem.* **2020**, *151*, 640-649. doi:10.1016/j.plaphy.2020.04.016
- Nadeem, F.; Ahmad, Z.; Ul Hassan, M.; Wang, R.; Diao, X.; Li, X. Adaptation of foxtail millet (*Setaria italica* L.) to abiotic stresses: A special perspective of responses to nitrogen and phosphate limitations. *Front. Plant Sci.* **2020**, *11*, 187. doi:10.3389/fpls.2020.00187
- Khan, A.; Zhao, X.Q.; Javed, M.T.; Khan, K.S.; Bano, A.; Shen, R.F.; et al. *Bacillus pumilus* enhances tolerance in rice (*Oryza sativa* L.) to combined stresses of NaCl and high boron due to limited uptake of Na<sup>+</sup>. *Environ. Exp. Bot.* **2016**, *124*, 120–129. doi:10.1016/j.envexpbot.2015.12.011
- Egamberdiyeva, D. The effect of plant growth promoting bacteria on growth and nutrient uptake of maize in two different soils. *Appl. Soil Ecol.* **2007**, *36*, 184–189.
- Kang, S.-M.; Khan, A.L.; Waqas, M.; You, Y.-H.; Kim, J.-H.; Kim, J.-G., Hamayun, M.; Lee, I.-J. Plant growth-promoting rhizobacteria reduce adverse effects of salinity and osmotic stress by regulating phytohormones and antioxidants in *Cucumis sativus*. *J. Plant Interact.* **2014**, *9*(1), 673–682. doi:10.1080/17429145.2014.894587
- Huang, X.-D.; El-Alawi, Y.; Penrose, D.M.; Glick, B.R.; Greenberg, B.M. A multi-process phytoremediation system for removal of polycyclic aromatic hydrocarbons from contaminated soils. *Environ. Pollut.* **2004**, *130*(3), 465–476. doi:10.1016/j.envpol.2003.09.031
- Kumar, A.; Singh, R.; Yadav, A.; Giri, D.D.; Singh, P.K.; Pandey, K.D. Isolation and characterization of bacterial endophytes of *Curcuma longa* L. *3 Biotech.* **2016**, *6*, 60.

Sandhya, V.Z.A.S.; Grover, M.; Reddy, G.; Venkateswarlu, B. Alleviation of drought stress effects in sunflower seedlings by the exopolysaccharides producing *Pseudomonas putida* strain GAP-P45. *Biol. Fertil. Soils*. **2009**, *46*, 17–26

Vurukonda, S.S.K.P.; Vardharajula, S.; Shrivastava, M.; SkZ, A. Enhancement of drought stress tolerance in crops by plant growth promoting rhizobacteria. *Microbiol. Res.* **2016**, *184*, 13–24. doi:10.1016/j.micres.2015.12.003

Sharma, B.; Dangi, A.K.; Shukla, P. Contemporary enzyme based technologies for bioremediation: A review. *J. Environ. Manag.* **2018**, *210*, 10–22. doi:10.1016/j.jenvman.2017.12.075

He, H.; Ye, Z.; Yang, D.; Yan, J.; Xiao, L.; Zhong, T.; Yuan, M.; Cai, X.; Fang, Z.; Jing, Y. Characterization of endophytic *Rahnella* sp. JN6 from *Polygonum pubescens* and its potential in promoting growth and Cd, Pb, Zn uptake by *Brassica napus*. *Chemosphere*. **2013**, *90*, 1960–1965. doi:10.1016/j.chemosphere.2012.10.057

Kamaruzzaman, M.A.; Sheikh Abdullah, S.R.; Hasan, H.A.; Hassan, M.; Othman, A.R.; Idris, M. Characterization of Pb-resistant plant growth-promoting rhizobacteria (PGPR) from *Scirpus grossus*. *Biocatal. Agric. Biotechnol.* **2019**, *101456*. doi:10.1016/j.bcab.2019.101456

Kartik, V.P.; Jinal, H.N.; Amaresan, N. Characterization of cadmium-resistant bacteria for its potential in promoting plant growth and cadmium accumulation in *Sesbania bispinosa* root. *Int. J. Phytoremed.* **2016**, *18*, 1061–1066. doi:10.1080/15226514.2016.1183576

Li, X.; Yan, Z.; Gu, D.; Li, D.; Tao, Y.; Zhang, D.; Su, L.; Ao, Y. Characterization of cadmium-resistant rhizobacteria and their promotion effects on *Brassica napus* growth and cadmium uptake. *J. Basic Microbiol.* **2019**, *59*(6), 579–590. doi:10.1002/jobm.201800656

Ma, Y.; Oliveira, R.S.; Wu, L.; Luo, Y.; Rajkumar, M.; Rocha, I.; Freitas, H. Inoculation with metal-mobilizing plant-growth-promoting rhizobacterium *Bacillus* sp. SC2b and its role in rhizoremediation. *J. Toxicol. Environ. Health, Part A*. **2015**, *78*(13–14), 931–944. doi:10.1080/15287394.2015.1051205

Hassen, W.; Neifar, M.; Cherif, H.; Najjari, A.; Chouchane, H.; Driouich, R.C.; Salah, A.; Naili, F.; Mosbah, A.; Souissi, Y.; Raddadi N. *Pseudomonas rhizophila* S211, a new plant growth promoting rhizobacterium with potential in pesticide bioremediation. *Front. Microbiol.* **2018**, *9*(34), 1–17.

Subrahmanyam, G.; Sharma, R.K.; Kumar, G.N.; Archana, G. *Vigna radiata* var. GM4 plant growth enhancement and root colonization by a multi-metal resistant plant growth promoting bacterium *Enterobacter* sp. C1D in Cr (vi)-amended soils. *Pedosphere*. **2018**, *28*(1), 144–156.

Egamberdieva, D.; Davranov, K.; Wirth, S.; Hashem, A.; Abd Allah, E.F. Impact of soil salinity on the plant-growth-promoting and biological control abilities of root associated bacteria. *Saudi J. Biol. Sci.* **2017**, *24*(7), 1601–1608.

Mallick, I.; Bhattacharyya, C.; Mukherji, S.; Dey, D.; Sarkar, S.C.; Mukhopadhyay, U.K.; Ghosh, A., Effective rhizoinoculation and biofilm formation by arsenic immobilizing halophilic plant growth promoting bacteria (PGPB) isolated from mangrove rhizosphere: A step towards arsenic rhizoremediation. *Sci. Total Environ.* **2018**, *610*, 1239–1250.

Sánchez-López, A.S.; Pintelon I.; Stevens, V.; Imperato, V.; Timmermans, J.P.; González-Chávez, C.; Carrillo-González, R.; Van Hamme, J.; Vangronsveld, J.; Thijs S. Seed endophyte microbiome of *Crotalaria pumila* unpeeled: identification of plant-beneficial methylobacteria. *Int. J. Mol. Sci.* **2018**, *19*(1), 291.

Meliani, A.; Bensoltane, A. Biofilm-mediated heavy metals bioremediation in PGPR *Pseudomonas*. *J. Bioremed. Biodegrad.* **2016**, *7*(5), 2–9.

Patel, H.A.; Patel, R.K.; Khristi, S.M.; Parikh, K.; Rajendran, G. Isolation and characterization of bacterial endophytes from *Lycopersicon esculentum* plant and their plant growth promoting characteristics. *Nepal J. Biotechnol.* **2012**, *2*(1), 37–52.

Ali Khan, A.H.; Tanveer, S.; Alia, S.; Anees, M.; Sultan, A.; Iqbal, M.; Yousaf, S. Role of nutrients in bacterial biosurfactant production and effect of biosurfactant production on petroleum hydrocarbon biodegradation. *Ecol. Eng.* **2017**, *104*, 158–164. doi:10.1016/j.ecoleng.2017.04.023
